# Supplementary material
Source: MDPI journal article supplement (https://www.mdpi.com/2409-515X/8/1/12)
Supplement: s1 [file s1]

Supplementary Table S1: Proportion of initial CK-MM concentration for LC, MD, and NB samples at time points 10, 20, 30, 40, and 50 in each storage condition. Results are calculated mean proportions of initial CK-MM concentrations with standard error (SE).

| <i>Time Since Initial<br/>(Days)</i> | <i>LC Samples</i>                |           |                                  |           | <i>MD Samples</i>                |           |                                  |           | <i>NB Samples</i>                |           |
|--------------------------------------|----------------------------------|-----------|----------------------------------|-----------|----------------------------------|-----------|----------------------------------|-----------|----------------------------------|-----------|
|                                      | <i>Low Humidity</i>              |           | <i>Ambient Humidity</i>          |           | <i>Low Humidity</i>              |           | <i>Ambient Humidity</i>          |           | <i>Low Humidity</i>              |           |
|                                      | <i>Proportion of<br/>Initial</i> | <i>SE</i> |
| <b>10</b>                            | 1.0683                           | 0.0394    | 1.0247                           | 0.0455    | 0.9331                           | 0.0149    | 0.9039                           | 0.0201    | 0.9184                           | 0.0079    |
| <b>20</b>                            | 0.8675                           | 0.0330    | 0.8630                           | 0.0453    | 0.9520                           | 0.0189    | 0.8508                           | 0.0233    | 0.9065                           | 0.0094    |
| <b>30</b>                            | 0.9655                           | 0.0375    | 0.8757                           | 0.0361    | 0.9151                           | 0.0255    | 0.8291                           | 0.0293    | 0.8614                           | 0.0072    |
| <b>40</b>                            | 0.8947                           | 0.0519    | 0.8365                           | 0.0427    | 0.9791                           | 0.0330    | 0.8891                           | 0.0278    | 0.8714                           | 0.0068    |
| <b>50</b>                            | 1.0513                           | 0.0542    | 0.7884                           | 0.0600    | 0.8875                           | 0.0275    | 0.7666                           | 0.0259    | 0.8159                           | 0.0081    |

Supplementary Table S2: Proportion of initial CK-MM concentration for LC, MD, and NB samples at time points 2, 4, 6, and 8 days in high temperature and high humidity storage. Results are calculated mean proportions of initial CK-MM concentrations with standard error (SE).

| LC Samples                |                       |        | MD Samples            |        | NB Samples            |        |
|---------------------------|-----------------------|--------|-----------------------|--------|-----------------------|--------|
| Time Since Initial (Days) | Proportion of Initial | SE     | Proportion of Initial | SE     | Proportion of Initial | SE     |
| 2                         | 0.9483                | 0.0380 | 0.8735                | 0.0246 | 1.0167                | 0.0240 |
| 4                         | 0.8182                | 0.0269 | 0.8143                | 0.0259 | 0.9782                | 0.0227 |
| 6                         | 0.8624                | 0.0337 | 0.8213                | 0.0314 | 0.8826                | 0.0199 |
| 8                         | 0.8467                | 0.0343 | 0.7643                | 0.0257 | 0.7944                | 0.0182 |
